# Supplementary material for: CX3CR1 deficiency promotes muscle repair and regeneration by enhancing macrophage ApoE production
Source: PubMed Central journal article supplement (PMC4686853; doi:10.1038/ncomms9972), 2015-12-03
Supplement: ncomms9972-s1.pdf [file ncomms9972-s1.pdf]

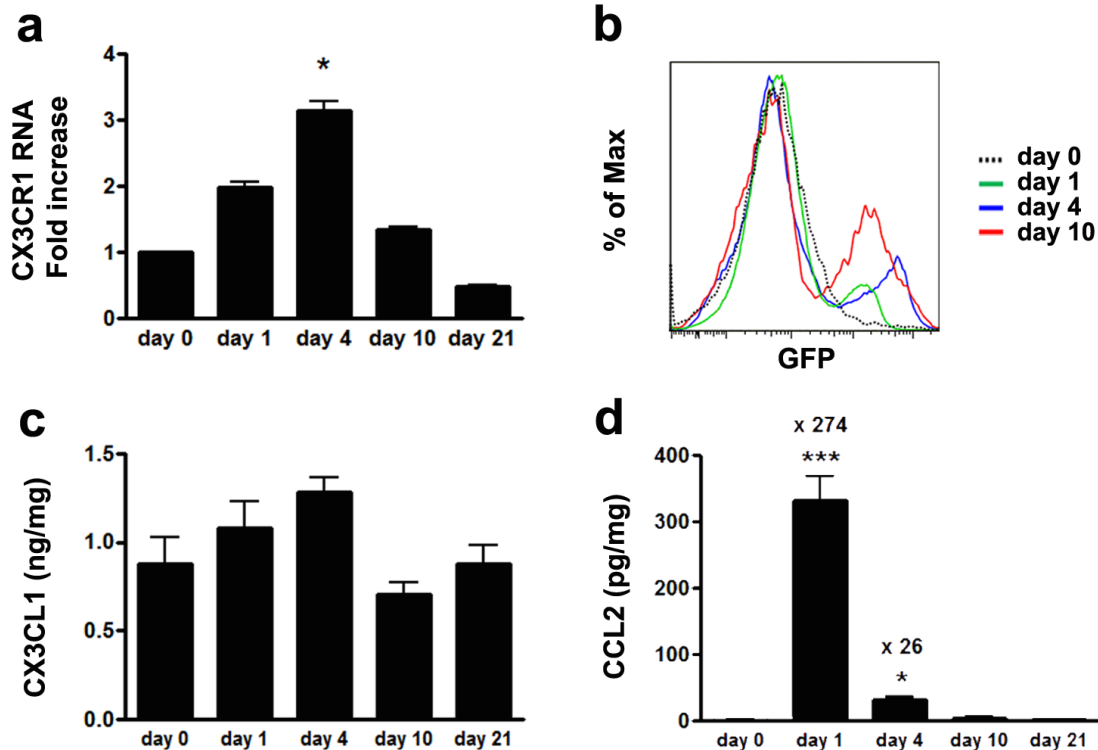

### Supplementary Figure 1

#### Chemokine and chemokine receptor expression during muscle regeneration

**(a)** Analysis of CX3CR1 mRNA expression by real time-PCR at day 0, 1, 4, 10 and 21 post- muscle injury. **(b)** Mean of fluorescence intensity of GFP expression measured by flow cytometry in muscular cell suspension of *Cx3cr1<sup>gfp/+</sup>* mice at day 0 (black dotted line), day 1 (green), day 4 (blue) and day 10 (red) post-injury (one representative experiment out of 3) **(c)** CX3CL1 and **(d)** CCL2 proteins detection by ELISA on muscle tissue lysates extracted at days 0, 1, 4, 10 and 21 post-injury. Data are mean + s.e.m. of 3 to 4 mice per time point in 2 to 4 distinct experiments. \* $p < 0.05$  and \*\*\*  $p < 0.001$  for each time point versus day 0.

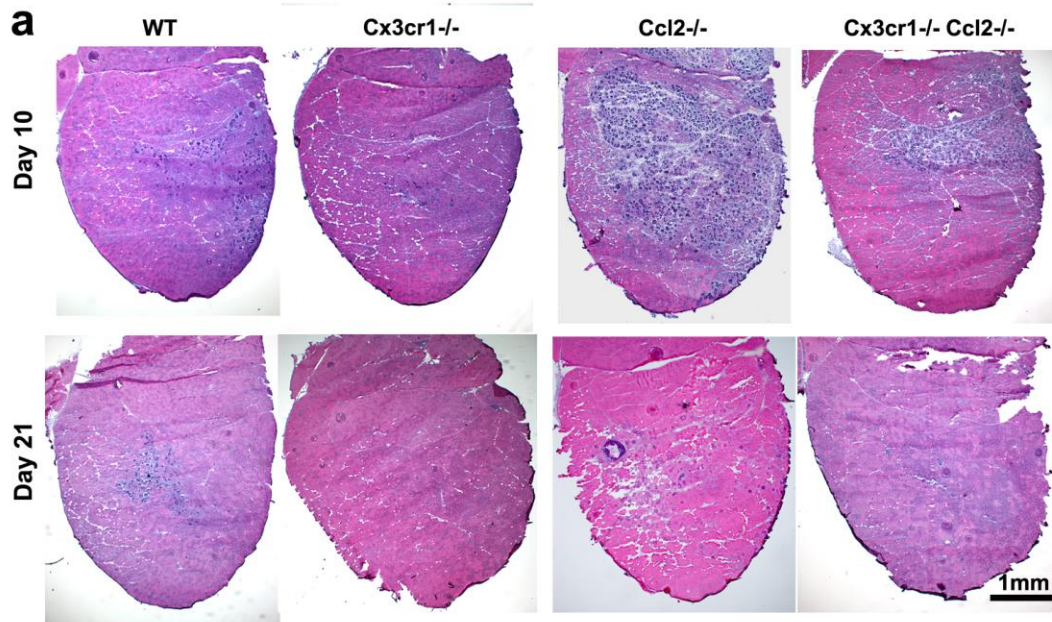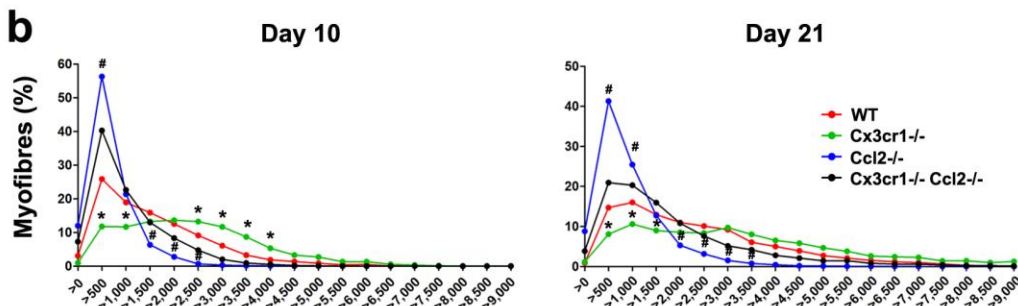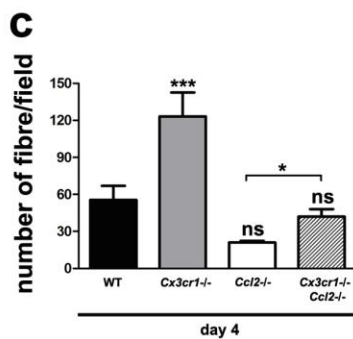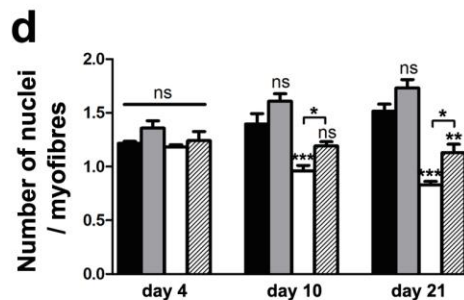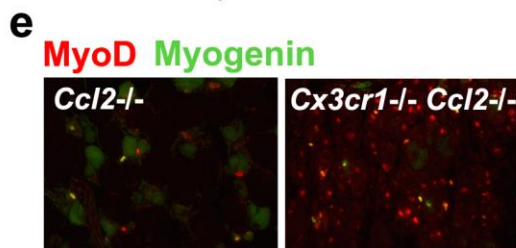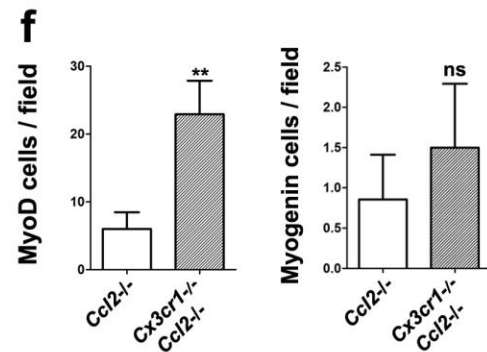

## Supplementary Figure 2

### Muscle regeneration in WT, Cx3cr1<sup>-/-</sup>, Ccl2<sup>-/-</sup> and Cx3cr1<sup>-/-</sup> Ccl2<sup>-/-</sup> mice

(a) Representative whole muscle cross-section of injured muscle from WT, Cx3cr1<sup>-/-</sup>, Ccl2<sup>-/-</sup> and Cx3cr1<sup>-/-</sup> Ccl2<sup>-/-</sup> mice on days 10 and 21 post-injury. (b) Distribution of CSA of regenerating myofibres

for each mouse strain on days 10 and 21 post-injury. Data are means + s.e.m. of 6 mice per strain in 2 distinct experiments. \* $p < 0.05$  for *Cx3cr1*<sup>-/-</sup> strain versus wild-type and # $p < 0.05$  for *Ccl2*<sup>-/-</sup> versus *Cx3cr1*<sup>-/-</sup> *Ccl2*<sup>-/-</sup> strains. **(c)** Quantification of the total number of regenerating myofibres per field on day 4 post-injury. Data are means + s.e.m. of at least 3 different fields taken from 6 different mice per strain. **(d)** Number of myonuclei inside regenerating myofibres divided by the total number of regenerating myofibres on day 4 post-injury. Data are means + s.e.m. of at least 3 different fields taken from 6 different mice per strain. **(e)** Example of muscle cross-sections of *Ccl2*<sup>-/-</sup> and *Cx3cr1*<sup>-/-</sup> *Ccl2*<sup>-/-</sup> mice immunolabelled with MyoD (red) and myogenin antibodies (green) on day 4 post-injury. **(f)** Quantification of MyoD-positive and myogenin-positive cells in an average of 5 fields per mouse on day 4 post-injury (magnification of x40). Data are mean + s.e.m. of 2 different mice per strain. ns: not significant, \* $p < 0.05$ , \*\* $p < 0.01$  and \*\*\*  $p < 0.001$  for each knock-out strain versus WT and for *Ccl2*<sup>-/-</sup> versus *Cx3cr1*<sup>-/-</sup> *Ccl2*<sup>-/-</sup> mice.

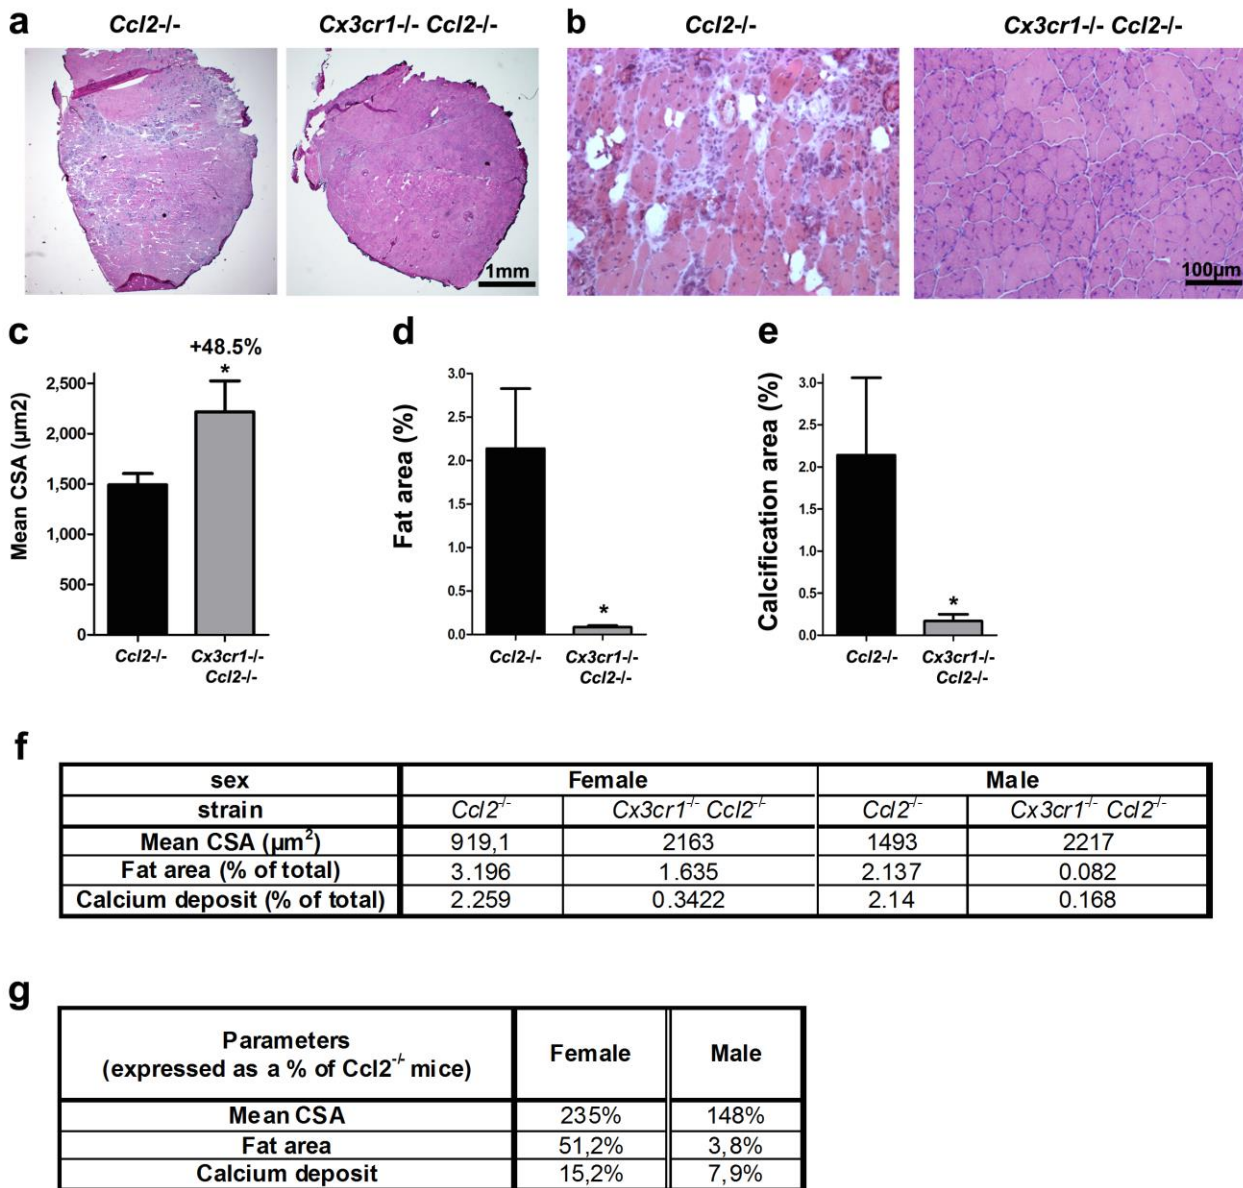

### Supplementary Figure 3

#### Analysis of muscle regeneration in male and female *Ccl2*<sup>-/-</sup> and *Cx3cr1*<sup>-/-</sup> *Ccl2*<sup>-/-</sup> mice

(a) Representative whole muscle cross-sections on day 21 post-injury of *Ccl2*<sup>-/-</sup> and *Cx3cr1*<sup>-/-</sup> *Ccl2*<sup>-/-</sup> male mice. (b) 100x magnification of representative injured muscle of *Ccl2*<sup>-/-</sup> and *Cx3cr1*<sup>-/-</sup> *Ccl2*<sup>-/-</sup> male mice. (c-e) Quantification of muscle regeneration, by measurement of the mean CSA of regenerating myofibres (c), and the areas of fat (d) and calcification (e). Results are mean + s.e.m. of 4 mice per group. (f, g) Comparison of muscle regeneration between *Ccl2*<sup>-/-</sup> and *Cx3cr1*<sup>-/-</sup> *Ccl2*<sup>-/-</sup> female/male mice on day 21 post-injury, expressed as absolute values (f) and percentages (g).

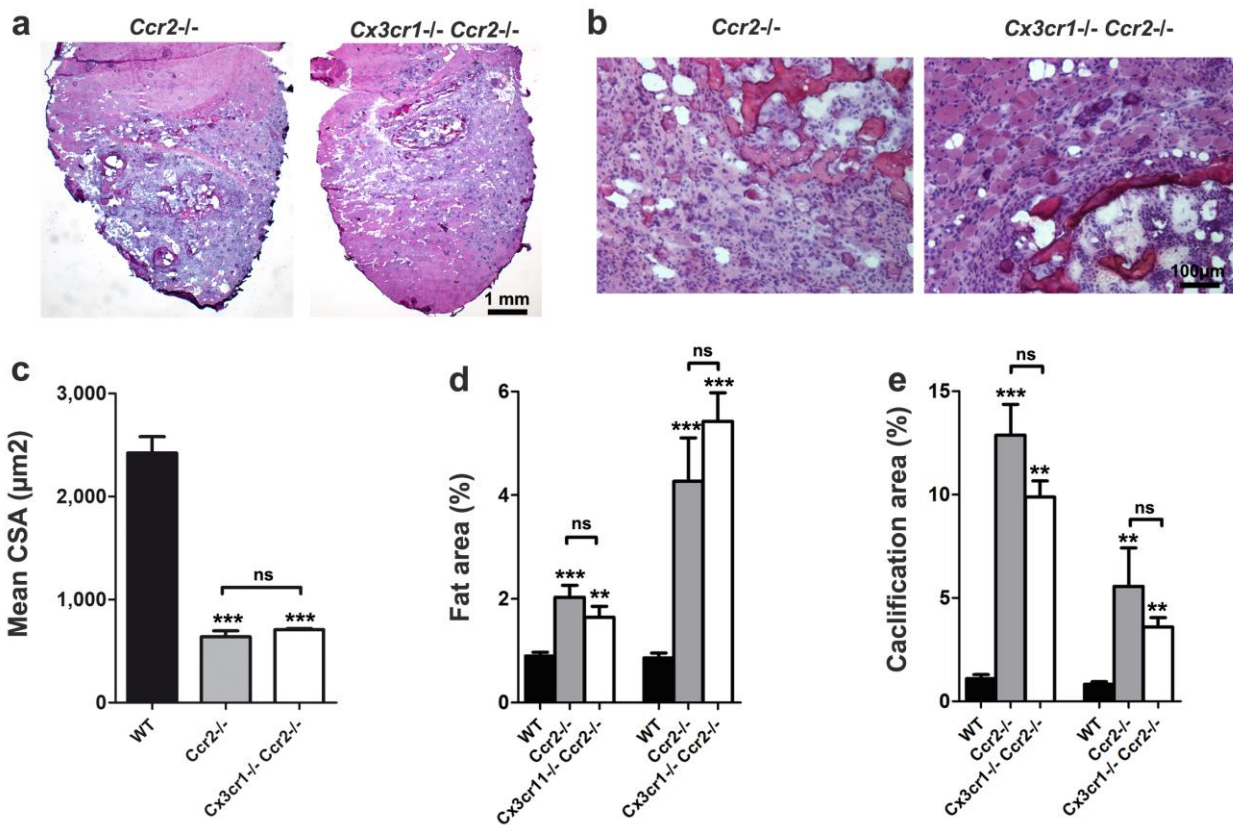

#### Supplementary Figure 4

##### Analysis of muscle regeneration in *Ccr2*<sup>-/-</sup> and *Cx3cr1*<sup>-/-</sup> *Ccr2*<sup>-/-</sup> mice

(a) Representative whole muscle cross-sections on day 21 post-injury of *Ccr2*<sup>-/-</sup> and *Cx3cr1*<sup>-/-</sup> *Ccr2*<sup>-/-</sup> female mice. (b) 100 $\times$  magnification of representative injured muscle of *Ccr2*<sup>-/-</sup> and *Cx3cr1*<sup>-/-</sup> *Ccr2*<sup>-/-</sup> mice. (c-e) Quantification of muscle regeneration by measurement of the mean CSA of regenerating myofibres (c), and areas of fat (d) and calcification (e). Results are mean + s.e.m. of 3 mice per group. ns: not significant, \* $p < 0.05$ , \*\* $p < 0.01$  and \*\*\*  $p < 0.001$  for each knock-out strain versus WT mice.



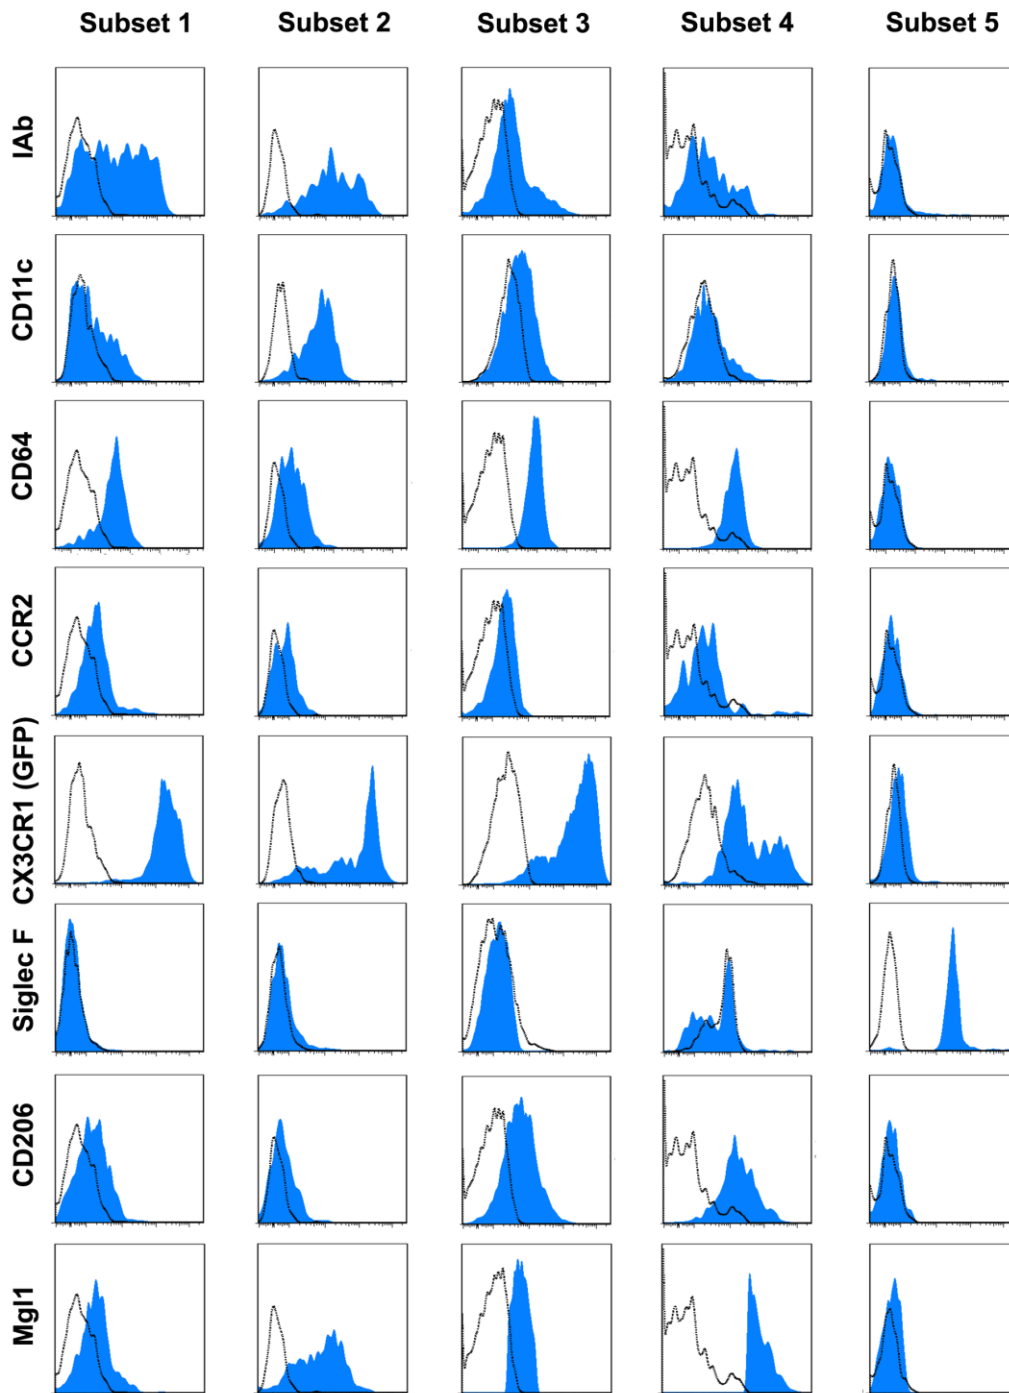

### Supplementary Figure 5

#### Phenotypic characterization of mononuclear phagocytes in injured muscle of WT mice

Cells were been sorted from injured muscles of WT mice on day 4 post-injury after enzymatic digestion and analysed for various surface markers by flow cytometry. Subsets 1, 2, 3 and 4 of MPs identified in Figure 3 as well as F4/80<sup>+</sup> CD11b<sup>+</sup> Mgl1<sup>-</sup> cells corresponding to eosinophils were stained with haematoxylin/eosin and tested for expression of IAb (major histocompatibility complex (MHC) molecules - class II), CD11c, CD64, CCR2, CX3CR1, Siglec F, CD206 and Mgl1. Histograms of 1 representative experiment out of 3.

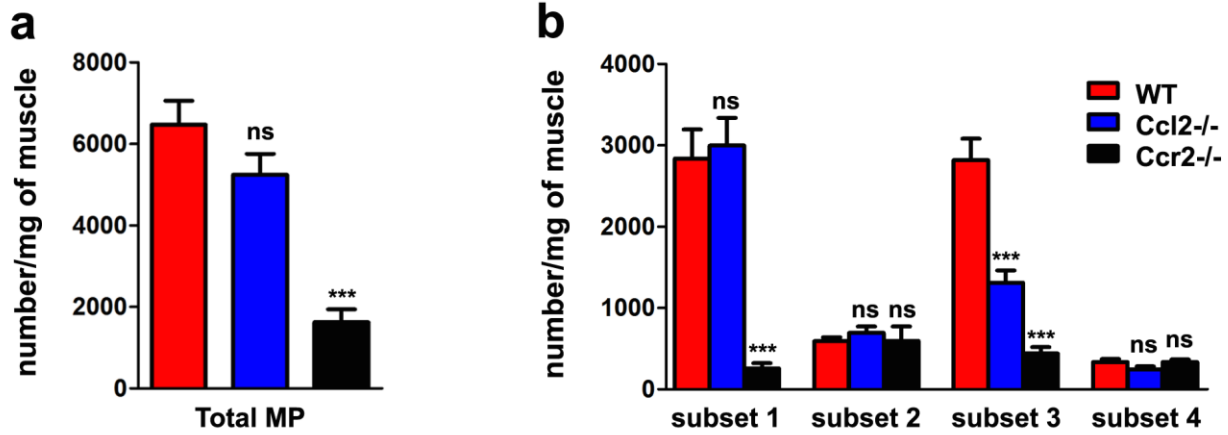

**Supplementary Figure 6**

**Mononuclear phagocyte distribution 4 days post-injury in *Ccl2*<sup>-/-</sup> and *Ccr2*<sup>-/-</sup> mice**

**(a)** Total number and **(b)** number per subset of MPs extracted from injured muscles of WT (*n*=12), *Ccl2*<sup>-/-</sup> (*n*=12) and *Ccr2*<sup>-/-</sup> (*n*=4) mice. ns: not significant, \*\*\* *p*<0.001 for each knock-out strain versus WT mice.

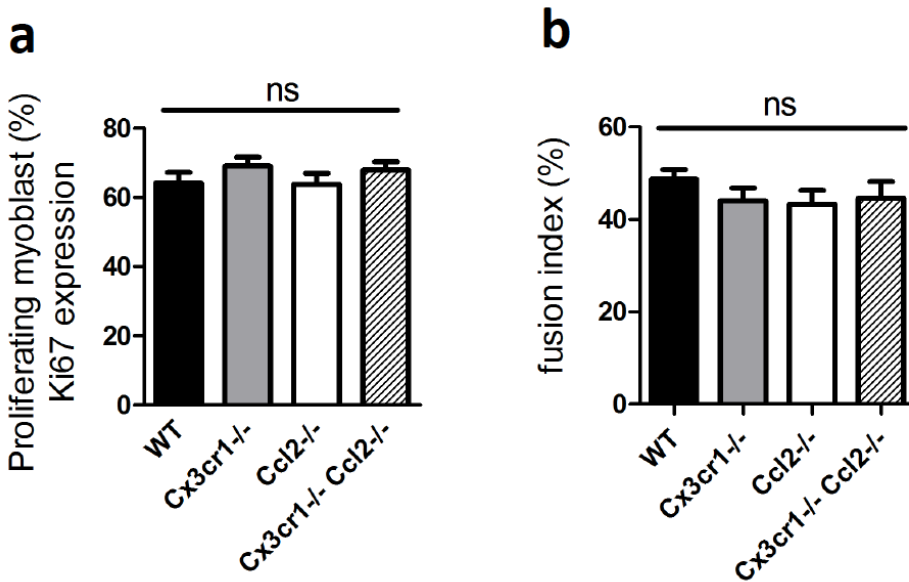

**Supplementary Figure 7**  
**Macrophages effect toward myogenesis**

In vitro experiments have been performed to understand the role of CX3CR1 and CCL2 expressing macrophage toward myogenic precursor cells proliferation (Ki67 expression) and fusion (% of myoblast within myotubes vs total number of myoblast counted). **(a)** 24h conditioned media from WT, Cx3cr1<sup>-/-</sup>, Ccl2<sup>-/-</sup> and Cx3cr1<sup>-/-</sup> Ccl2<sup>-/-</sup> bone marrow derived macrophages have been added on primary myogenic precursor cells and the Ki67 expression has been assessed 1 day later. **(b)** Myoblast fusion index has been assessed 4 days after macrophage conditioned media addition. Results are a mean + s.e.m. of 2 distinct experiments. ns: not significant



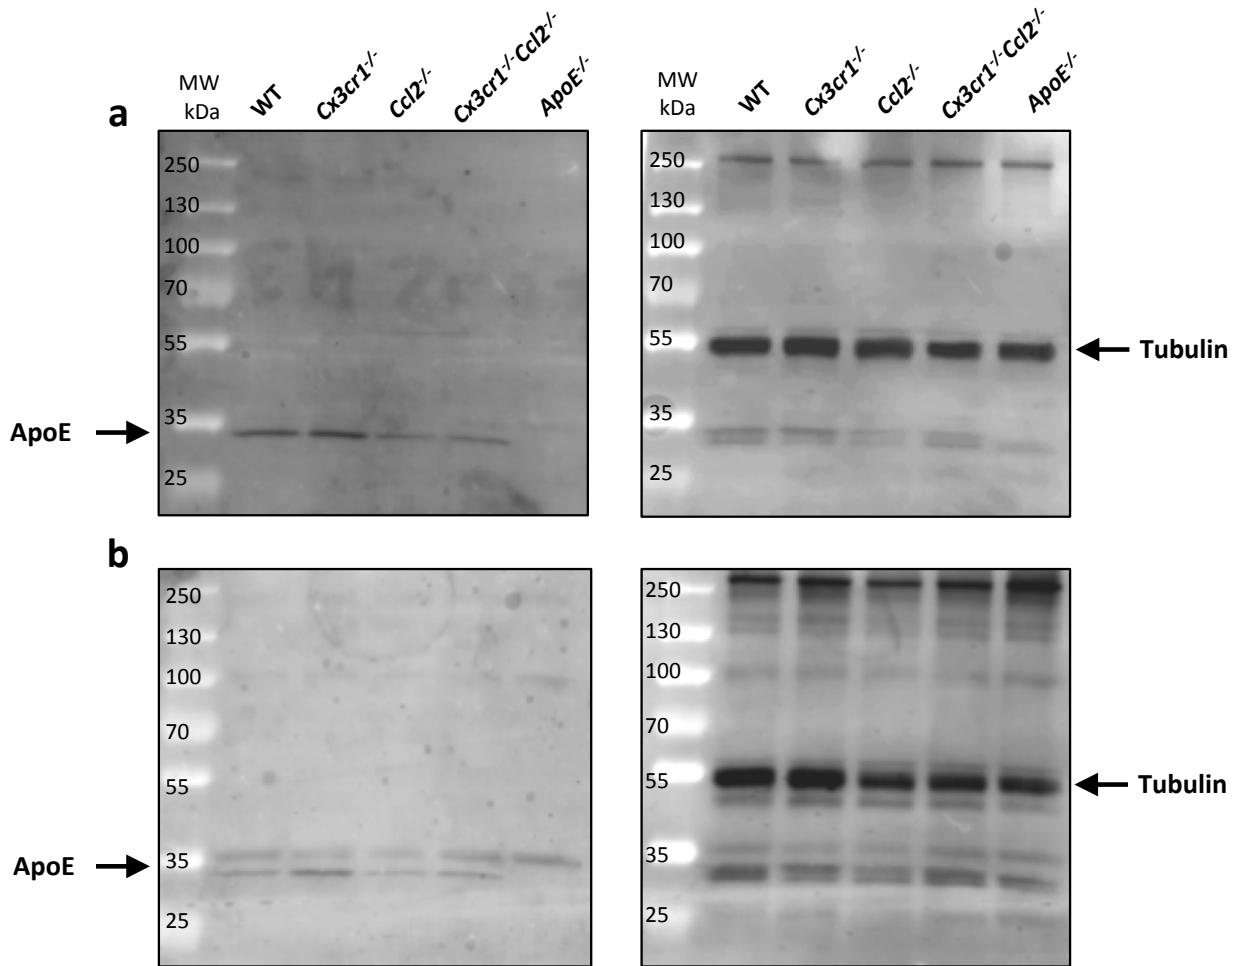

**Supplementary Figure 8**

**ApoE expression in mononuclear phagocytes from injured muscle of WT, *Cx3cr1*<sup>-/-</sup>, *Ccl2*<sup>-/-</sup> and *Cx3cr1*<sup>-/-</sup>*Ccl2*<sup>-/-</sup> mice**

Mononuclear phagocytes were isolated from muscle of WT, *Cx3cr1*<sup>-/-</sup>, *Ccl2*<sup>-/-</sup>, *Cx3cr1*<sup>-/-</sup>*Ccl2*<sup>-/-</sup> and *ApoE*<sup>-/-</sup> mice 4 days post-notexin injection using magnetic columns (CD11b+ Ly6G- NK1.1-). Western-blots (45µg of total protein/lane) were performed using antibodies against ApoE (left panel) and against tubulin (right panel) from 2 independent experiments (a and b) (First lane: Molecular weight (MW) indicated in kDa).

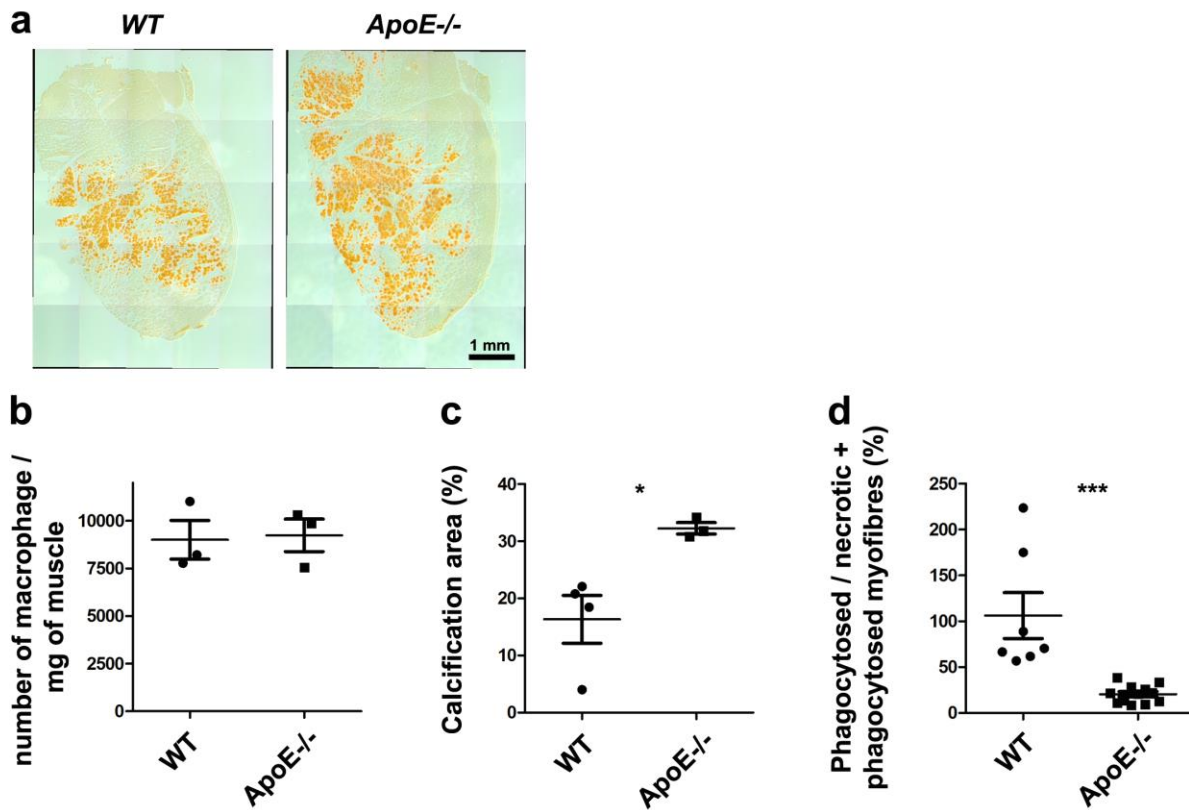

### Supplementary Figure 9

#### Necrotic/calcified myofibres removal by mononuclear phagocytes in ApoE<sup>-/-</sup> mice

(a) Representative whole muscle cross-sections on day 4 post-injury of WT and ApoE<sup>-/-</sup> female mice stained with Alizarin Red. (b) Total number of MPs extracted from injured muscles of WT (n=3) and ApoE<sup>-/-</sup> (n=3) mice. Quantification of muscle debris removal by assesment of the calcification area (n=3 mice per strain) (c) as well as the percentage of phagocytosed vs necrotic myofibres (d) on day 4 post-injury. WT (n=7) and ApoE<sup>-/-</sup> (n=10) mice. Results are a mean + s.e.m. of 2 distinct experiments. ns: not significant, \*p<0.05 and \*\*\* p<0.001 for ApoE<sup>-/-</sup> mice versus WT mice.

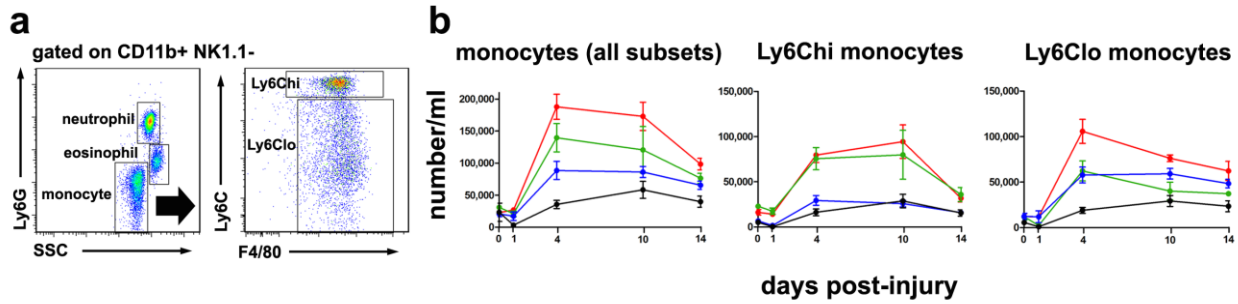

## Supplementary Figure 10

### Kinetics of blood monocytosis during skeletal muscle regeneration

Blood was collected in heparin, labelled with Ly6G, CD11b, F4/80, NK1.1 and Ly6C antibodies and analysed by flow cytometry. **(a)** The two subsets of blood monocytes are identified as CD11b<sup>+</sup> F4/80<sup>+</sup> Ly6G<sup>-</sup> NK1.1<sup>-</sup> SSC<sup>low</sup> cells according to the expression level of Ly6C antigen. Ly6C<sup>high</sup> monocytes correspond to the so-called inflammatory monocytes whereas Ly6C<sup>low</sup> monocytes correspond to patrolling MOs. **(b)** Kinetics of blood monocytes depicted as total number and number of Ly6C<sup>high</sup> and Ly6C<sup>low</sup> monocytes during muscle regeneration in WT (red line), *Cx3cr1* (green line), *Ccl2* (blue line) and *Cx3cr1 Ccl2* (black line) -deficient mice. Data are mean + s.e.m. of at least 6 mice per strain and per time point in 2 to 4 distinct experiments.
